# Supplementary material for: Direct imaging reveals stable, micrometer-scale lipid domains that segregate proteins in live cells
Source: PubMed Central journal article supplement — J Cell Biol. 2013 Jul 8;202(1):35–44. doi: 10.1083/jcb.201301039 (PMC3704982; doi:10.1083/jcb.201301039), 2013-07-08
Supplement: supp_jcb.201301039_JCB_201301039_sm.pdf [file supp_jcb.201301039_JCB_201301039_sm.pdf]

Toulmay and Prinz, <http://www.jcb.org/cgi/content/full/jcb.201301039/DC1>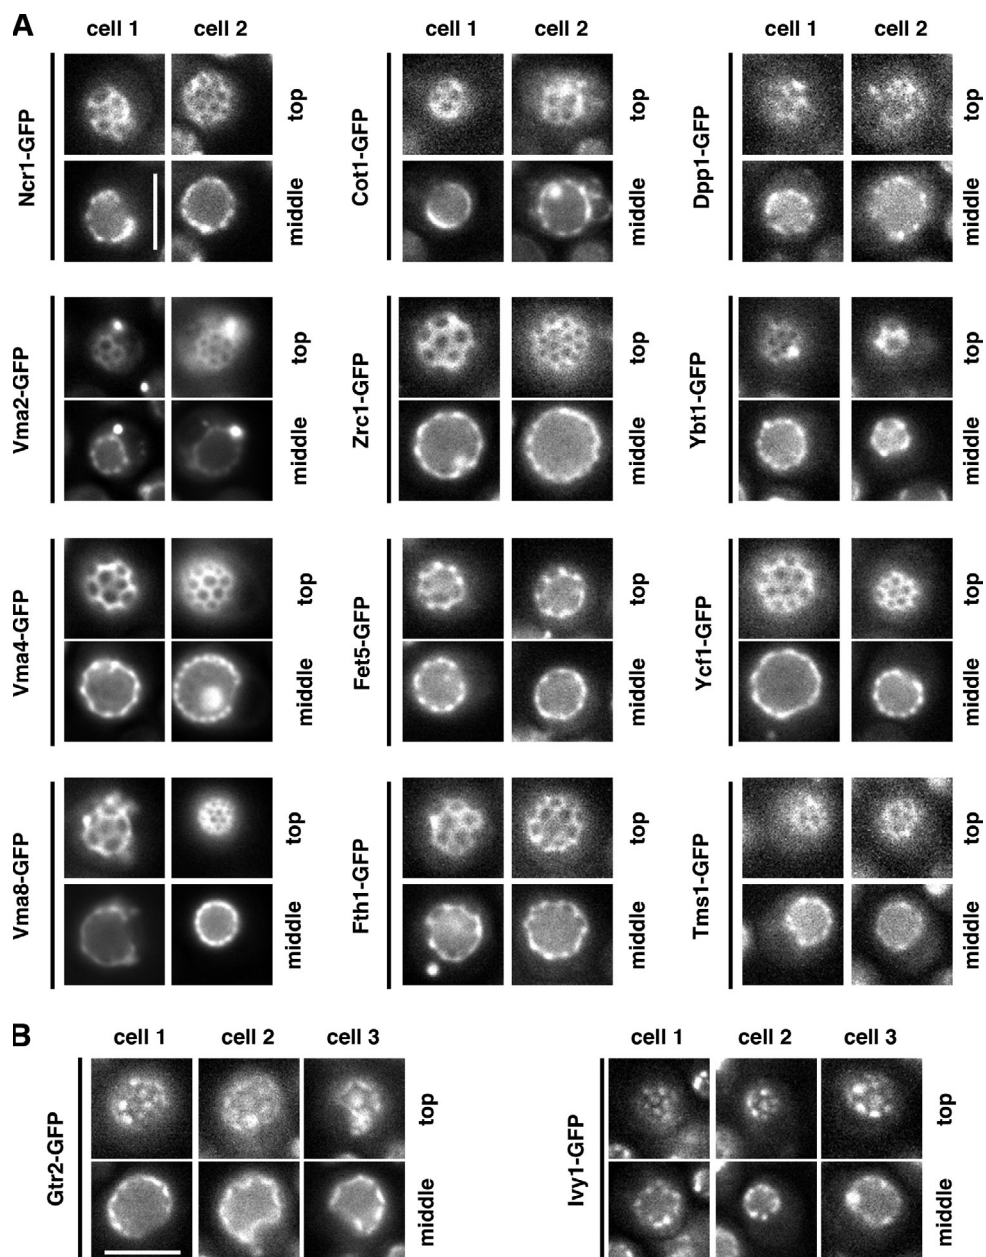

Figure S1. **Localization of 14 vacuolar membrane proteins during Stat-phase.** Cells expressing C-terminal GFP fusions to the indicated proteins were grown to Stat-phase and visualized live by fluorescent microscopy. The fusions were expressed from the chromosome under endogenous promoters. The middle section and top section of the vacuoles are shown. (A) Strains expressing fusions with domain patterns similar to that of Vph1-GFP. (B) Strains expressing fusions with domain patterns opposite to that of Vph1-GFP. Bar, 5  $\mu$ m.

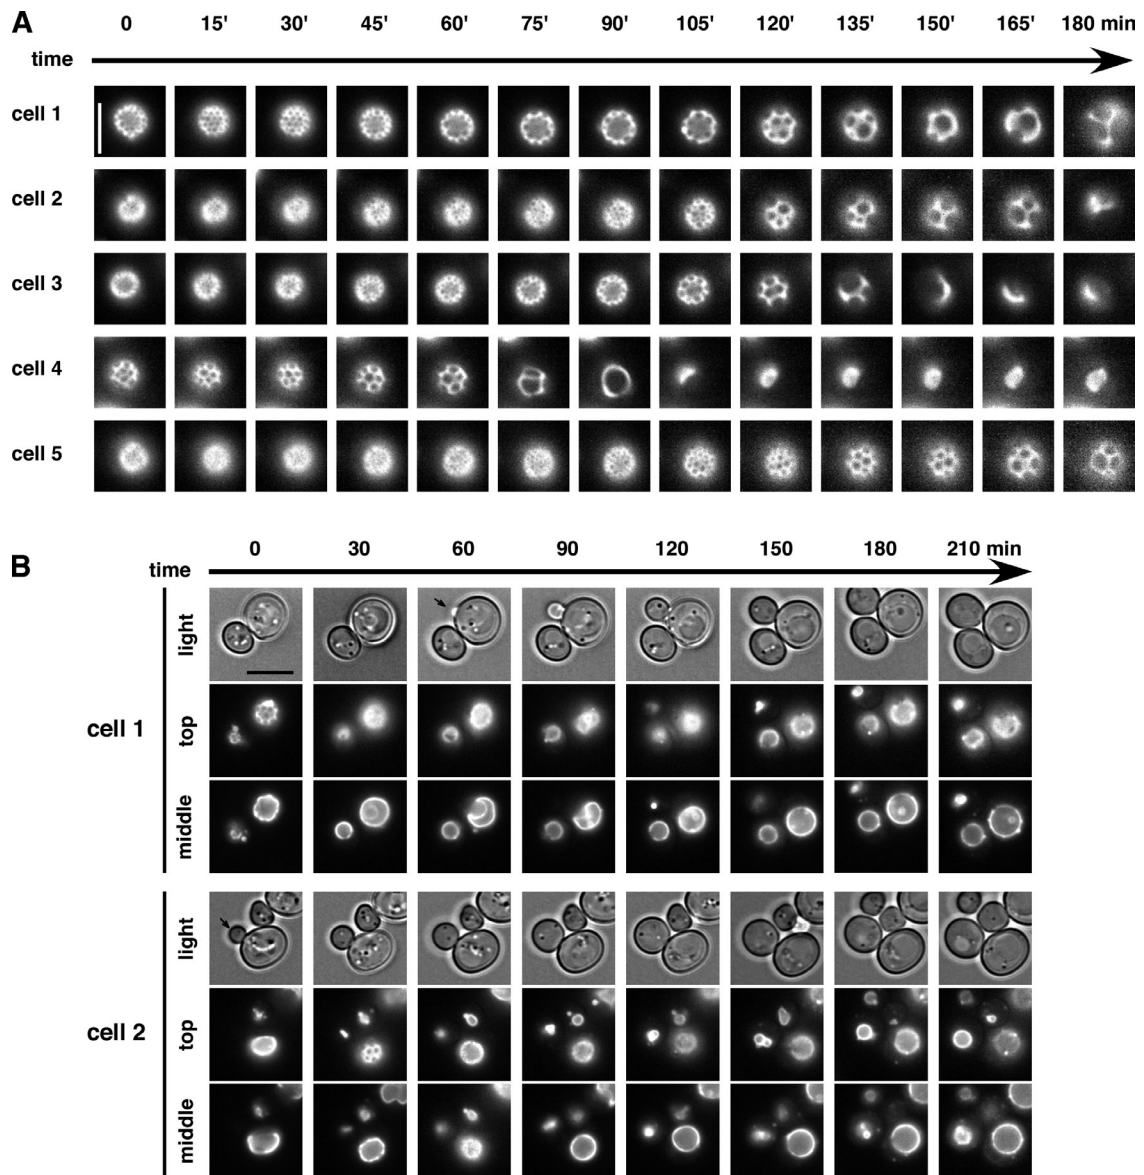

Figure S2. **Time-lapse imaging of vacuole domains and demonstration that cells with vacuolar microdomains are alive and grow.** (A) Cells expressing Vph1-GFP were grown to Stat-phase and imaged every 15 min in SC medium. Five examples are shown. The top sections of the vacuole were imaged. (B) Cells expressing Vph1-GFP were grown to Stat-phase, placed on an agar pad containing fresh SC media (time 0), and imaged every 30 min. Two examples are shown. The middle and top sections of the vacuole were imaged. Arrows show growing buds. Bars, 5  $\mu$ m.

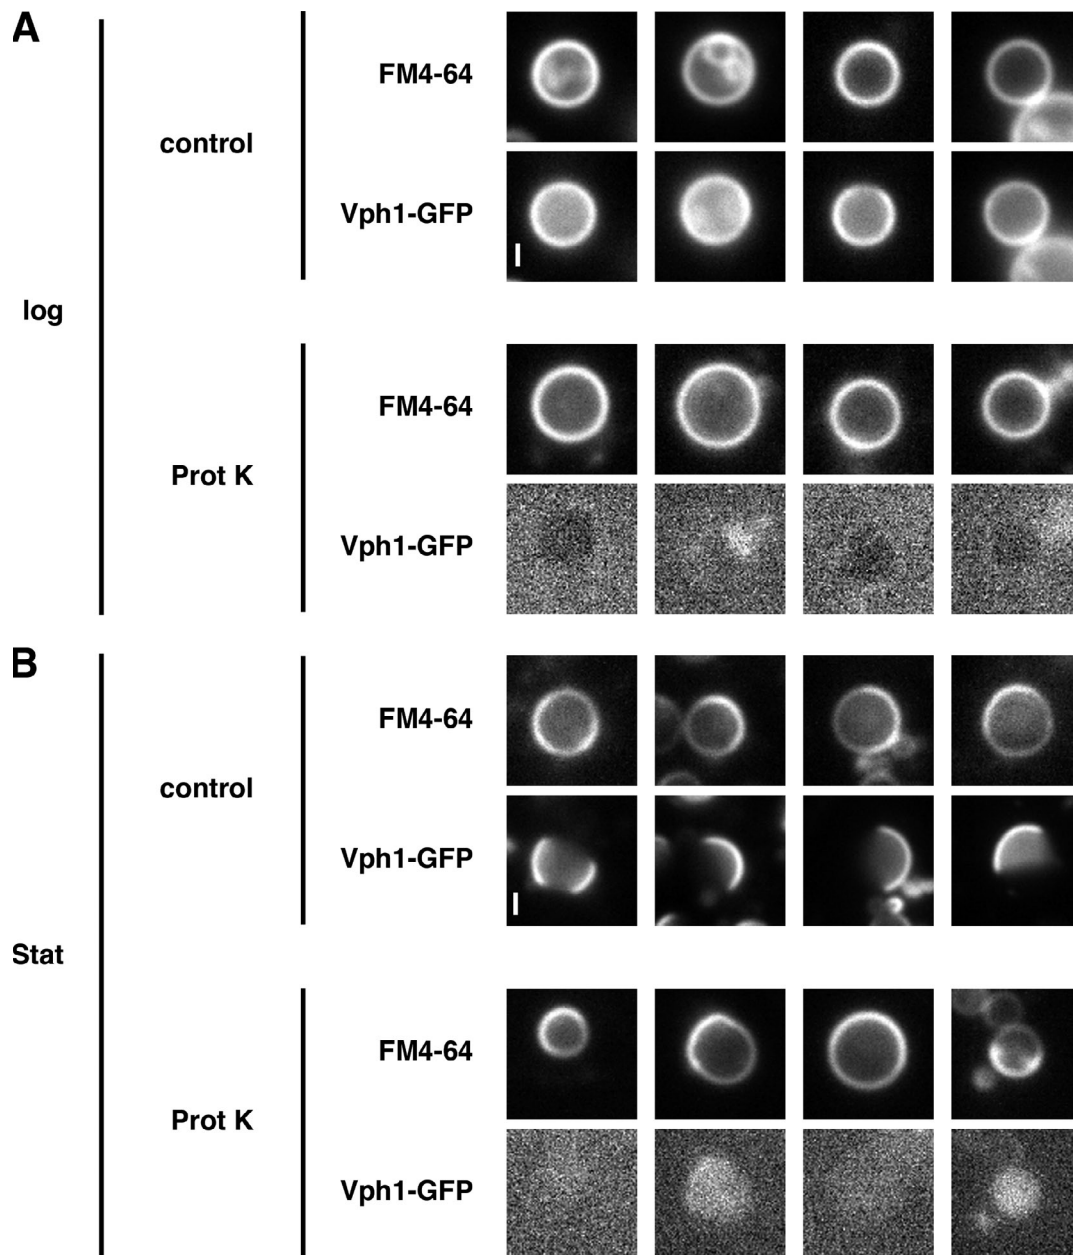

Figure S3. **Cytosolic proteins are not required to maintain vacuolar domains.** Intact vacuoles were isolated from cells expressing Vph1-GFP and grown in medium containing FM4-64. (A and B) Cells were harvested in logarithmic-phase (log) cells (A) or Stat-phase (stat) cells (B). 0.1 mg/ml Proteinase K (Prot K) or breaking buffer (control) was added to the vacuoles, and they were incubated for 1 h at 30°C. The vacuoles were imaged by fluorescence microscopy. The loss of proteins was indicated by the disappearance of the Vph1-GFP signal from the vacuoles. Bars, 1  $\mu$ m.

Table S1. Results of screen for mutants with decreased percentage of cells with quasi-symmetrical domains during starvation

| Genes                          | Functions                              | Categories    | Results <sup>a</sup> | Comments                                          |
|--------------------------------|----------------------------------------|---------------|----------------------|---------------------------------------------------|
| WT                             | None                                   | Control       | +                    |                                                   |
| <i>atg8</i>                    | Required for autophagy/Cvt             | Autophagy     | +                    |                                                   |
| <i>atg15</i>                   | Vacuole lipase                         | Autophagy     | +                    |                                                   |
| <i>cho2</i>                    | Phosphatidylcholine synthesis          | Lipid         | ±                    |                                                   |
| <i>cpt1</i>                    | PC synthesis                           | Lipid         | +                    |                                                   |
| <i>erg5</i>                    | Ergosterol synthesis                   | Lipid         | +                    | Weak fluorescence, many vacuoles                  |
| <i>erg6</i>                    | Ergosterol synthesis                   | Lipid         | +                    | Weak fluorescence, many vacuoles                  |
| <i>fab1</i>                    | Phosphoinositide 3.5 kinase            | Lipid         | –                    | Big unique vacuole                                |
| <i>ipt1</i>                    | Sphingolipid synthesis                 | Lipid         | +                    |                                                   |
| <i>isc1</i>                    | Sphingolipid hydrolase                 | Lipid         | +                    |                                                   |
| <i>lac1</i>                    | Ceramide synthase                      | Lipid         | +                    |                                                   |
| <i>lag1</i>                    | Ceramide synthase                      | Lipid         | +                    | Weak fluorescence                                 |
| <i>lcb3</i>                    | Long chain base phosphatase            | Lipid         | +                    | Dying                                             |
| <i>ncr1</i>                    | Niemann Pick C1 protein                | Lipid         | +                    |                                                   |
| <i>nem1</i>                    | Phospholipid homeostasis               | Lipid         | –                    | Enriched at vacuole-vacuole contacts sites        |
| <i>opi3</i>                    | PC synthesis                           | Lipid         | ±                    | Weak fluorescence, unusual domains                |
| <i>osh1</i>                    | Oxysterol-binding protein              | Lipid/NVJ     | +                    |                                                   |
| <i>scs7</i>                    | Sphingolipid-hydroxylase               | Lipid         | +                    |                                                   |
| <i>sur2</i>                    | Phytosphingosine synthase              | Lipid         | ±                    | Dying, unusual domains                            |
| <i>ard1</i>                    | G0 entry                               | Quiescence    | +                    |                                                   |
| <i>bck1</i>                    | PKC signaling                          | Quiescence    | +                    | Dying                                             |
| <i>gcs1</i>                    | ARF GAP, Stat induced                  | Quiescence    | +                    |                                                   |
| <i>hsp26</i>                   | Small heat shock protein, Stat induced | Quiescence    | +                    |                                                   |
| <i>mpk1</i>                    | MAPK in PKC signaling                  | Quiescence    | –                    | Few unusual domains, dying                        |
| <i>snf1</i>                    | AMP kinase in glc signaling            | Quiescence    | +                    | Weak fluorescence                                 |
| <i>snz1</i>                    | Stat induced                           | Quiescence    | +                    |                                                   |
| <i>ego3</i>                    | EGO complex                            | Vac localized | +                    | Dying                                             |
| <i>gtr1</i>                    | GTPase EGO complex                     | Vac localized | +                    | Dying                                             |
| <i>gtr2</i>                    | GTPase EGO complex                     | Vac localized | +                    | Dying                                             |
| <i>ivy1</i>                    | Unknown                                | Vac localized | +                    |                                                   |
| <i>tco89</i>                   | Torc1                                  | Vac localized | +                    | Weak fluorescence                                 |
| <i>tor1</i>                    | Torc1                                  | Vac localized | +                    | Dying                                             |
| <i>nvj1</i>                    | NVJ                                    | NVJ           | +                    |                                                   |
| <i>nvj2</i>                    | Unknown                                | NVJ localized | +                    |                                                   |
| <i>ccz1</i>                    | Vac assembly + autophagy               | VPS/autophagy | ND                   | Many tiny vacuoles                                |
| <i>end3</i>                    | Endocytosis                            | VPS           | +                    |                                                   |
| <i>pep12</i>                   | Late endosome t-SNARE                  | VPS           | +                    | Weak fluorescence, many vacuoles                  |
| <i>vac8</i>                    | CVT + NVJ                              | VPS/NVJ       | +                    | Dying                                             |
| <i>vam3</i>                    | Vac t-SNARE                            | VPS           | ND                   | Many tiny vacuoles                                |
| <i>vam7</i>                    | Vac SNARE                              | VPS           | ND                   | Many tiny vacuoles                                |
| <i>vps33</i>                   | HOPS                                   | VPS           | +                    | Many tiny vacuoles, but few big ones have domains |
| <i>vps4</i>                    | MVB AAA-ATPase                         | VPS           | –                    | Weak fluorescence, dying                          |
| <i>vps41</i>                   | HOPS                                   | VPS           | +                    |                                                   |
| <i>ypt7</i>                    | HOPS                                   | VPS           | ND                   | Many tiny vacuoles                                |
| <b>Other growth conditions</b> |                                        |               |                      |                                                   |
| <i>are1 are2</i>               | Steryl ester synthase                  | Lipid         | +                    |                                                   |
| <i>ole1</i>                    | Δ9 fatty acid desaturase               | Lipid         | +                    |                                                   |
| <i>psd1 psd2</i>               | Phosphatidylserine decarboxylase       | Lipid         | +                    |                                                   |
| <i>arv1</i>                    | Transport glycosylphosphatidylinositol | Lipid         | +                    |                                                   |
| <i>elo3</i>                    | Very long chain fatty acid elongase    | Lipid         | +                    |                                                   |
| <i>vph1</i>                    | VO-a v-ATPase                          | Vac localized | +                    | Strain expressing Ivy1-mCherry                    |
| <i>vma3</i>                    | VO-c v-ATPase                          | Vac localized | +                    |                                                   |
| <i>vma4</i>                    | V1-e v-ATPase                          | Vac localized | +                    |                                                   |
| <i>pep4</i>                    | Main vacuolar protease                 | Vac localized | +                    |                                                   |

ARF, ADP ribosylation factor; GAP, GTPase-activating protein; Cvt, cytoplasm to vacuole targeting; HOPS, homotypic fusion and vacuole protein sorting; MVB, multi-vesicular body; Vac, vacuole; VPS, vacuolar protein sorting.

<sup>a</sup>Percentage of cells with vacuoles with quasi-symmetrical domains, similar to WT (+), moderately less than WT (±), or substantially less than WT (–).



Table S2. Strains used in this study

| Strains | Relevant genotype                                                                   | Reference        |
|---------|-------------------------------------------------------------------------------------|------------------|
| WPY333  | BY4741 mat a <i>leu2Δ his3Δ ura3Δ met15Δ</i>                                        |                  |
| ATY349  | BY4741 mat a <i>leu2Δ his3Δ ura3Δ met15Δ VPH1-GFP::HIS3</i>                         | Huh et al., 2003 |
| –       | BY4741 mat a <i>leu2Δ his3Δ ura3Δ met15Δ XXX-GFP::HIS3</i>                          | Huh et al., 2003 |
| ATY385  | BY4741 mat a <i>leu2Δ his3Δ ura3Δ met15Δ VPH1-GFP::HIS3 p416-IVY1-mCherry-URA3</i>  | This study       |
| ATY363  | BY4741 mat a <i>leu2Δ his3Δ ura3Δ met15Δ atg8::KanMX6 VPH1-GFP::HIS3</i>            | This study       |
| ATY387  | BY4741 mat a <i>leu2Δ his3Δ ura3Δ met15Δ atg15::KanMX6 VPH1-GFP::HIS3</i>           | This study       |
| ATY407  | BY4741 mat a <i>leu2Δ his3Δ ura3Δ met15Δ cho2::KanMX6 VPH1-GFP::HIS3</i>            | This study       |
| ATY408  | BY4741 mat a <i>leu2Δ his3Δ ura3Δ met15Δ cpt1::KanMX6 VPH1-GFP::HIS3</i>            | This study       |
| ATY371  | BY4741 mat a <i>leu2Δ his3Δ ura3Δ met15Δ erg5::KanMX6 VPH1-GFP::HIS3</i>            | This study       |
| ATY377  | BY4741 mat a <i>leu2Δ his3Δ ura3Δ met15Δ erg6::KanMX6 VPH1-GFP::HIS3</i>            | This study       |
| ATY364  | BY4741 mat a <i>leu2Δ his3Δ ura3Δ met15Δ fab1::KanMX6 VPH1-GFP::HIS3</i>            | This study       |
| ATY378  | BY4741 mat a <i>leu2Δ his3Δ ura3Δ met15Δ ipt1::KanMX6 VPH1-GFP::HIS3</i>            | This study       |
| ATY396  | BY4741 mat a <i>leu2Δ his3Δ ura3Δ met15Δ isc1::KanMX6 VPH1-GFP::HIS3</i>            | This study       |
| ATY379  | BY4741 mat a <i>leu2Δ his3Δ ura3Δ met15Δ lac1::KanMX6 VPH1-GFP::HIS3</i>            | This study       |
| ATY380  | BY4741 mat a <i>leu2Δ his3Δ ura3Δ met15Δ lag1::KanMX6 VPH1-GFP::HIS3</i>            | This study       |
| ATY365  | BY4741 mat a <i>leu2Δ his3Δ ura3Δ met15Δ lcb3::KanMX6 VPH1-GFP::HIS3</i>            | This study       |
| ATY381  | BY4741 mat a <i>leu2Δ his3Δ ura3Δ met15Δ ncr1::KanMX6 VPH1-GFP::HIS3</i>            | This study       |
| ATY367  | BY4741 mat a <i>leu2Δ his3Δ ura3Δ met15Δ nem1::KanMX6 VPH1-GFP::HIS3</i>            | This study       |
| ATY409  | BY4741 mat a <i>leu2Δ his3Δ ura3Δ met15Δ opi3::KanMX6 VPH1-GFP::HIS3</i>            | This study       |
| ATY382  | BY4741 mat a <i>leu2Δ his3Δ ura3Δ met15Δ osh1::KanMX6 VPH1-GFP::HIS3</i>            | This study       |
| ATY383  | BY4741 mat a <i>leu2Δ his3Δ ura3Δ met15Δ scs7::KanMX6 VPH1-GFP::HIS3</i>            | This study       |
| ATY397  | BY4741 mat a <i>leu2Δ his3Δ ura3Δ met15Δ sur2::KanMX6 VPH1-GFP::HIS3</i>            | This study       |
| ATY406  | BY4741 mat a <i>leu2Δ his3Δ ura3Δ met15Δ ard1::KanMX6 VPH1-GFP::HIS3</i>            | This study       |
| ATY393  | BY4741 mat a <i>leu2Δ his3Δ ura3Δ met15Δ bck1::KanMX6 VPH1-GFP::HIS3</i>            | This study       |
| ATY394  | BY4741 mat a <i>leu2Δ his3Δ ura3Δ met15Δ gcs1::KanMX6 VPH1-GFP::HIS3</i>            | This study       |
| ATY395  | BY4741 mat a <i>leu2Δ his3Δ ura3Δ met15Δ hsp26::KanMX6 VPH1-GFP::HIS3</i>           | This study       |
| ATY399  | BY4741 mat a <i>leu2Δ his3Δ ura3Δ met15Δ mpk1::KanMX6 VPH1-GFP::HIS3</i>            | This study       |
| ATY400  | BY4741 mat a <i>leu2Δ his3Δ ura3Δ met15Δ snf1::KanMX6 VPH1-GFP::HIS3</i>            | This study       |
| ATY401  | BY4741 mat a <i>leu2Δ his3Δ ura3Δ met15Δ snz1::KanMX6 VPH1-GFP::HIS3</i>            | This study       |
| ATY411  | BY4741 mat a <i>leu2Δ his3Δ ura3Δ met15Δ ego3::KanMX6 VPH1-GFP::HIS3</i>            | This study       |
| ATY412  | BY4741 mat a <i>leu2Δ his3Δ ura3Δ met15Δ gtr1::KanMX6 VPH1-GFP::HIS3</i>            | This study       |
| ATY413  | BY4741 mat a <i>leu2Δ his3Δ ura3Δ met15Δ gtr2::KanMX6 VPH1-GFP::HIS3</i>            | This study       |
| ATY414  | BY4741 mat a <i>leu2Δ his3Δ ura3Δ met15Δ ivy1::KanMX6 VPH1-GFP::HIS3</i>            | This study       |
| ATY390  | BY4741 mat a <i>leu2Δ his3Δ ura3Δ met15Δ tco89::KanMX6 VPH1-GFP::HIS3</i>           | This study       |
| ATY391  | BY4741 mat a <i>leu2Δ his3Δ ura3Δ met15Δ tor1::KanMX6 VPH1-GFP::HIS3</i>            | This study       |
| ATY366  | BY4741 mat a <i>leu2Δ his3Δ ura3Δ met15Δ nvj1::KanMX6 VPH1-GFP::HIS3</i>            | This study       |
| ATY368  | BY4741 mat a <i>leu2Δ his3Δ ura3Δ met15Δ nvj2::KanMX6 VPH1-GFP::HIS3</i>            | This study       |
| ATY415  | BY4741 mat a <i>leu2Δ his3Δ ura3Δ met15Δ ccz1::KanMX6 VPH1-GFP::HIS3</i>            | This study       |
| ATY388  | BY4741 mat a <i>leu2Δ his3Δ ura3Δ met15Δ end3::KanMX6 VPH1-GFP::HIS3</i>            | This study       |
| ATY389  | BY4741 mat a <i>leu2Δ his3Δ ura3Δ met15Δ pep12::KanMX6 VPH1-GFP::HIS3</i>           | This study       |
| ATY402  | BY4741 mat a <i>leu2Δ his3Δ ura3Δ met15Δ vac8::KanMX6 VPH1-GFP::HIS3</i>            | This study       |
| ATY403  | BY4741 mat a <i>leu2Δ his3Δ ura3Δ met15Δ vam3::KanMX6 VPH1-GFP::HIS3</i>            | This study       |
| ATY416  | BY4741 mat a <i>leu2Δ his3Δ ura3Δ met15Δ vam7::KanMX6 VPH1-GFP::HIS3</i>            | This study       |
| ATY404  | BY4741 mat a <i>leu2Δ his3Δ ura3Δ met15Δ vps33::KanMX6 VPH1-GFP::HIS3</i>           | This study       |
| ATY417  | BY4741 mat a <i>leu2Δ his3Δ ura3Δ met15Δ vps4::KanMX6 VPH1-GFP::HIS3</i>            | This study       |
| ATY405  | BY4741 mat a <i>leu2Δ his3Δ ura3Δ met15Δ vps41::KanMX6 VPH1-GFP::HIS3</i>           | This study       |
| ATY418  | BY4741 mat a <i>leu2Δ his3Δ ura3Δ met15Δ ypt7::KanMX6 VPH1-GFP::HIS3</i>            | This study       |
| ATY462  | BY4741 mat a <i>leu2Δ his3Δ ura3Δ met15Δ are1::KanMX6 are2::Leu2 VPH1-GFP::HIS3</i> | This study       |
| ATY370  | BY4741 mat a <i>leu2Δ his3Δ ura3Δ met15Δ elo3::KanMX6 VPH1-GFP::HIS3</i>            | This study       |
| ATY463  | BY4741 mat a <i>leu2Δ his3Δ ura3Δ met15Δ ole1::KanMX6 VPH1-GFP::HIS3</i>            | This study       |
| ATY386  | BY4741 mat a <i>leu2Δ his3Δ ura3Δ met15Δ vph1::KanMX6 p416-IVY1-mCherry-URA3</i>    | This study       |
| ATY575  | BY4741 mat a <i>leu2Δ his3Δ ura3Δ met15Δ vma3::KanMX6 VPH1-GFP::HIS3</i>            | This study       |
| ATY574  | BY4741 mat a <i>leu2Δ his3Δ ura3Δ met15Δ vma4::KanMX6 VPH1-GFP::HIS3</i>            | This study       |
| ATY547  | BY4741 mat a <i>leu2Δ his3Δ ura3Δ psd1::KanMX6 psd2::KanMX6 VPH1-GFP::HIS3</i>      | This study       |
| ATY546  | BY4741 mat a <i>leu2Δ his3Δ ura3Δ met15Δ arv1::KanMX6 VPH1-GFP::HIS3</i>            | This study       |
| ATY587  | mat a <i>ade2Δ his3Δ ura3-52Δ erg1::URA3 upc2-1 Ycplac111-VPH1-GFP-KanMX6-LEU2</i>  | This study       |
| ATY567  | BY4741 mat a <i>leu2Δ his3Δ ura3Δ met15Δ SEC18-1::LEU2 VPH1-GFP::HIS3</i>           | This study       |
| ATY572  | BY4741 mat a <i>leu2Δ his3Δ ura3Δ met15Δ rim21::KanMX6 VPH1-GFP::HIS3</i>           | This study       |

Table S2. **Strains used in this study** (Continued)

| Strains | Relevant genotype                                                          | Reference  |
|---------|----------------------------------------------------------------------------|------------|
| ATY568  | BY4741 mat a <i>leu2Δ his3Δ ura3Δ met15Δ dfg16::KanMX6 VPH1-GFP::HIS3</i>  | This study |
| ATY570  | BY4741 mat a <i>leu2Δ his3Δ ura3Δ met15Δ rim13::KanMX6 VPH1-GFP::HIS3</i>  | This study |
| ATY571  | BY4741 mat a <i>leu2Δ his3Δ ura3Δ met15Δ rim20::KanMX6 VPH1-GFP::HIS3</i>  | This study |
| ATY481  | BY4741 mat a <i>leu2Δ his3Δ ura3Δ met15Δ rim101::KanMX6 VPH1-GFP::HIS3</i> | This study |
| ATY552  | BY4741 mat a <i>leu2Δ his3Δ ura3Δ met15Δ pep4::KanMX6 VPH1-GFP::HIS3</i>   | This study |

The minus sign indicates that there is no strain number for this strain.

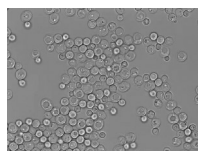

Video 1. **Vph1-GFP is segregated into microdomains at the vacuole membrane in Stat-phase.** Cells expressing Vph1-GFP were cultured to Stat-phase, and a stack of six fluorescent images was taken with increments of 0.4  $\mu\text{m}$  between images using a wide-field microscope (BX61; Olympus). Each frame in the video shows one image in the stack. The images are displayed from the bottom of the stack to the top and then back to the bottom.

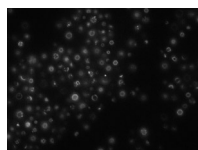

Video 2. **Microdomains on vacuole membrane are stable over minutes.** A strain expressing Vph1-GFP was cultured to Stat-phase, and fluorescent images were taken every minute for 10 min using a wide-field microscope (BX61; Olympus).

## Reference

Huh, W.K., J.V. Falvo, L.C. Gerke, A.S. Carroll, R.W. Howson, J.S. Weissman, and E.K. O'Shea. 2003. Global analysis of protein localization in budding yeast. *Nature*. 425:686–691. <http://dx.doi.org/10.1038/nature02026>
